# Supplementary material for: Left Ventricular Diastolic Function Following Anthracycline-Based Chemotherapy in Patients with Breast Cancer without Previous Cardiac Disease—A Meta-Analysis
Source: MDPI journal article supplement (doi:10.3390/jcm10173890), 2021-08-29

**Left ventricular diastolic function following anthracycline-based chemotherapy in patients with breast cancer without previous cardiac disease – a meta-analysis**

Raluca I Mincu, PhD<sup>1</sup>; Lena Lampe<sup>1</sup>; Amir A. Mahabadi, MD<sup>1</sup>, Rainer Kimmig, MD<sup>2</sup>, Tienush Rassaf, MD<sup>1</sup>; Matthias Totzeck, MD<sup>1\*</sup>

<sup>1</sup>Department of Cardiology and Vascular Medicine, West German Heart and Vascular Center, University Hospital Essen, Hufelandstraße 55, 45147 Essen, Germany

<sup>2</sup>Clinic for Obstetrics and Gynecology, Essen University Hospital, Essen, Germany

Supplementary material

#Corresponding author:

Dr. Matthias Totzeck

University Hospital Essen

West German Heart and Vascular Center

Department for Cardiology and Vascular Medicine

Hufelandstr. 55, 45147 Essen, Germany

Tel.: +49 201 723 84805

Fax: +49 201 723 5401

E-mail: Matthias.Totzeck@uk-essen.de

**Figure S1.**

**PRIMA flowchart for study selection**

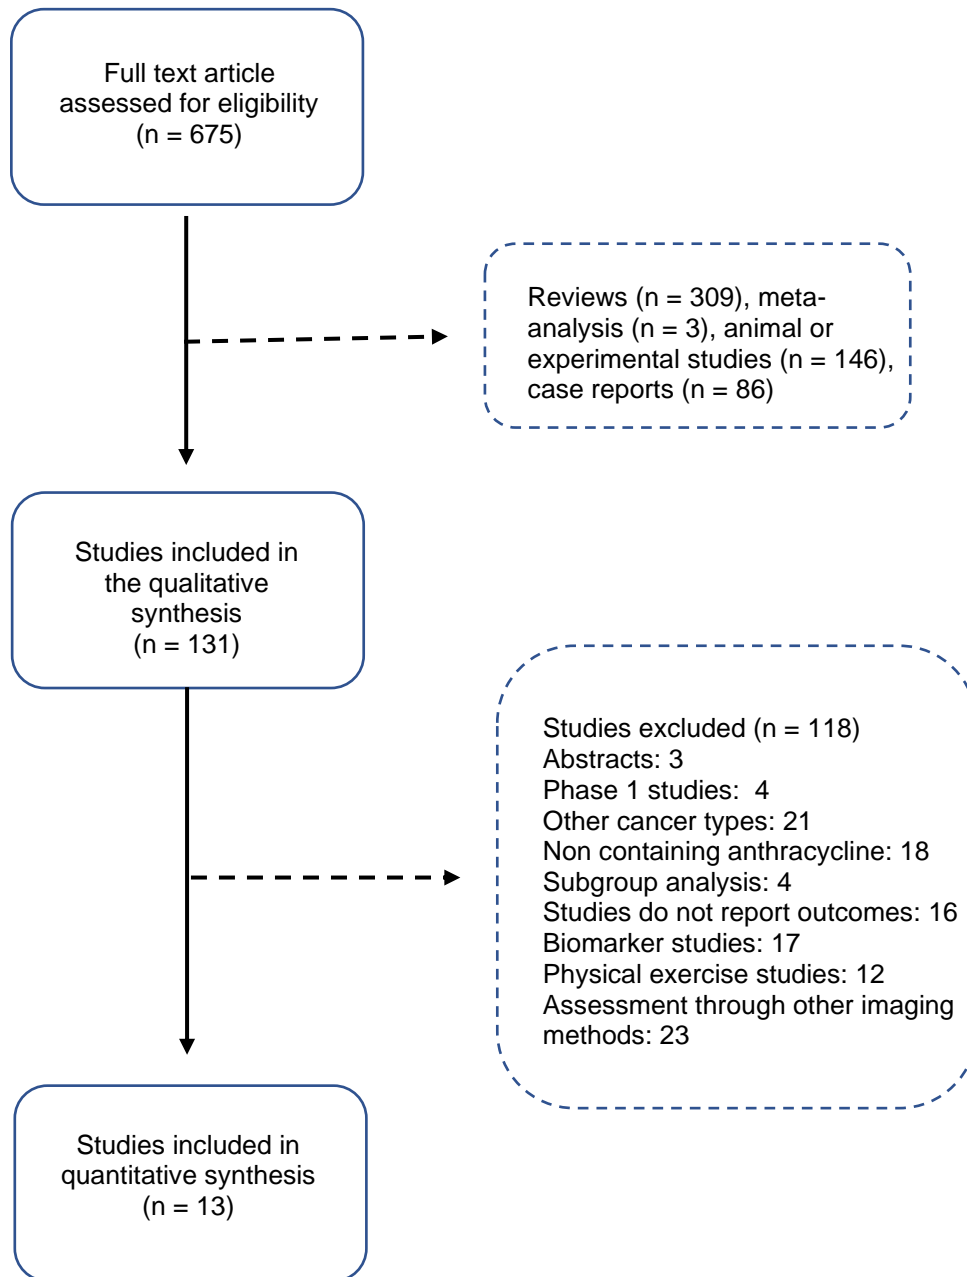

**Figure S2. Funnel plot of standard error by standard difference in means to assess the risk of bias for the analysis of E/A changes before and after anthracycline-based chemotherapy.**

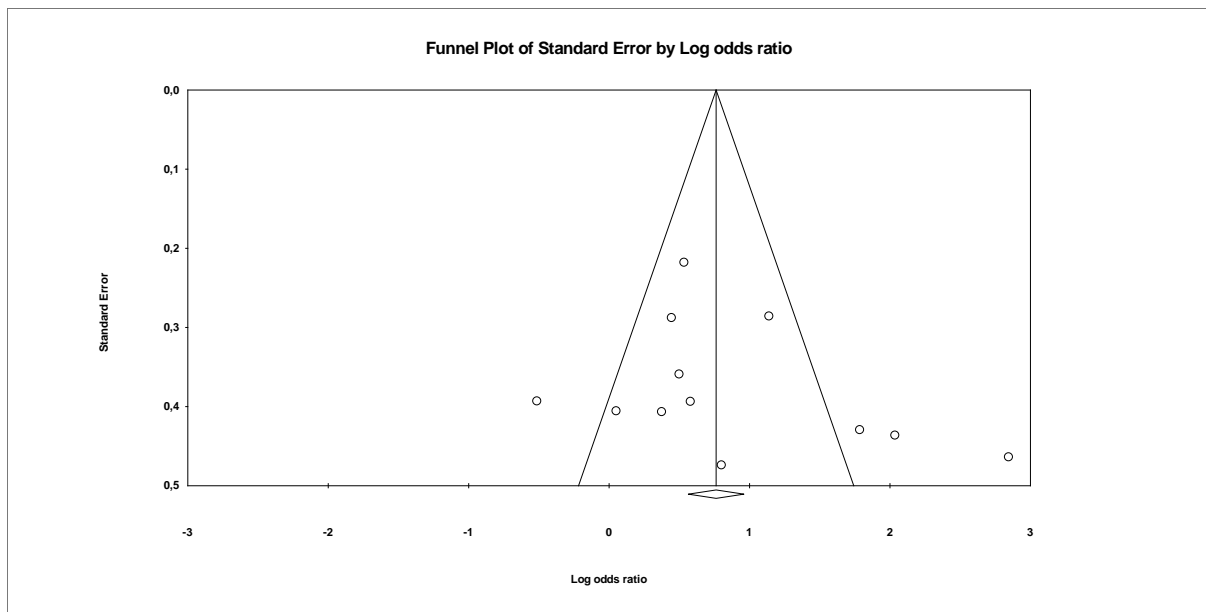

**Figure S3. Funnel plot of standard error by standard difference in means to assess the risk of bias for the analysis of E/e' changes before and after anthracycline-based chemotherapy.**

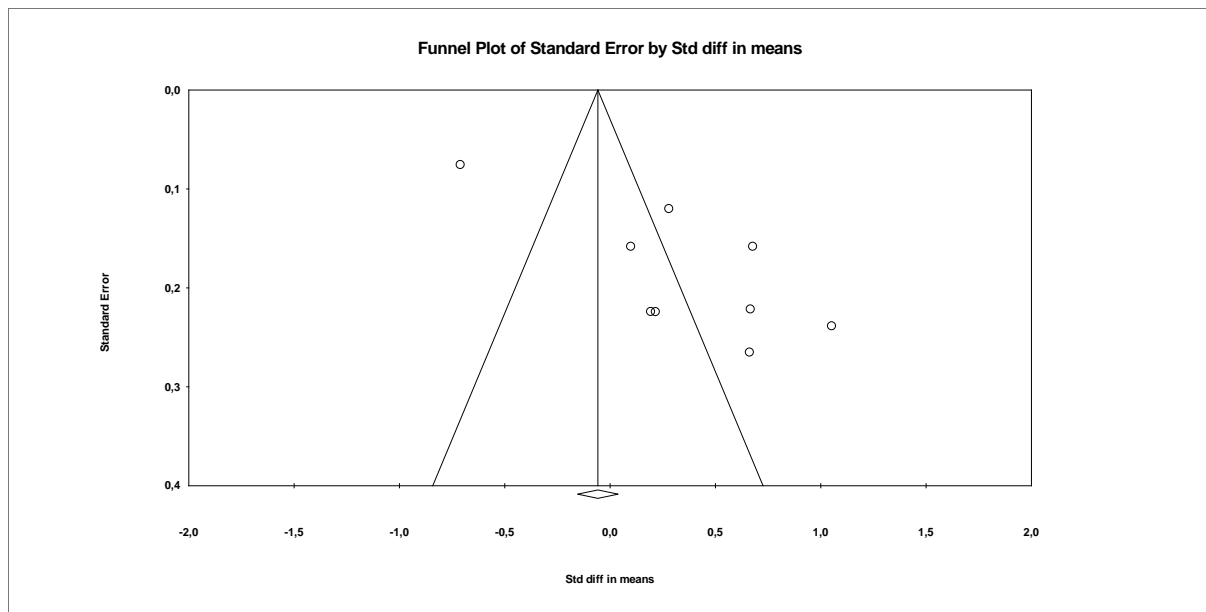

**Figure S4. Funnel plot of standard error by standard difference in means to assess the risk of bias for the analysis of LVEF changes before and after anthracycline-based chemotherapy.**

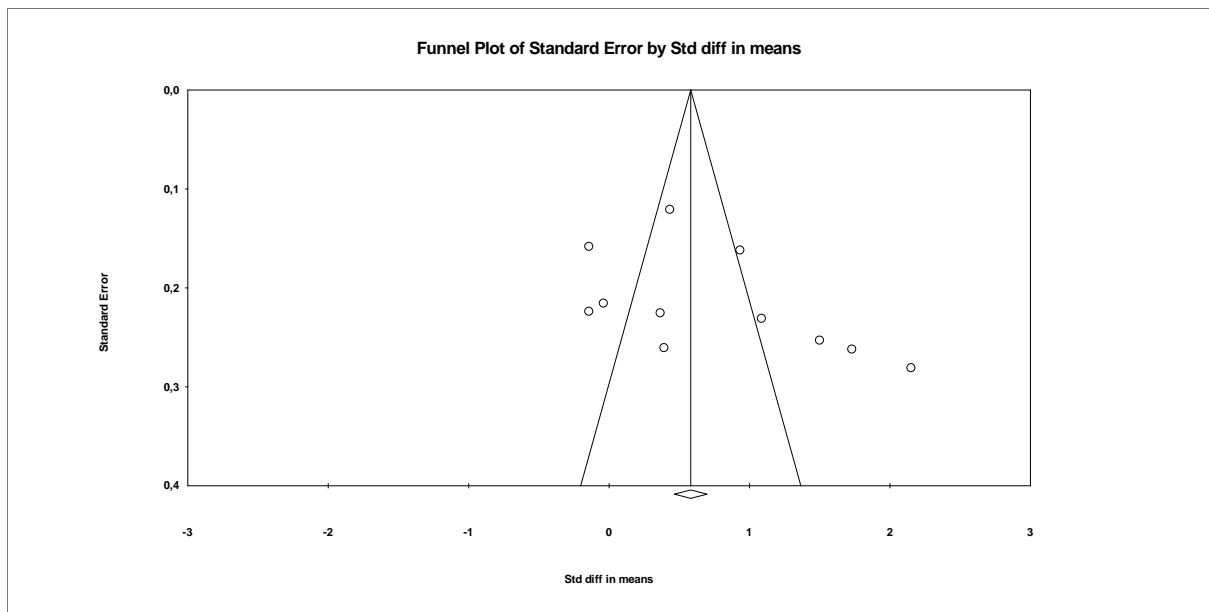

Supplement: s1 [file s1]
